# Supplementary material for: Identifying Patients with Bicuspid Aortic Valve Disease in UK Primary Care: A Case–Control Study and Prediction Model
Source: MDPI journal article supplement (doi:10.3390/jpm12081290), 2022-08-05
Supplement: s1 [file s1]

## Supplementary Files

### Supplementary material S1: Variables used for imputation.

To estimate missing values for blood pressure, pulse rate, BMI, multiple imputation with chained equations was used based on the following variables were used.

BMI, Diastolic BP, Systolic BP, Mean pulse, mean potassium, mean calcium, gender, diagnosis of hypertension, bradycardia diagnosis, tachycardia diagnosis, ethnicity, IBS diagnosis, atrial fibrillation diagnosis, stroke diagnosis, palpitation diagnosis, collapse diagnosis, betablocker category

### Supplementary material S2. Continuous variables missing data

| Variable | Missing data cases (2898) n (%) | Missing data controls (14,487) n (%) |
|----------|---------------------------------|--------------------------------------|
| BMI      | 1089 (37.6%)                    | 4737 (32.7%)                         |
| BP       | 58 (2.0%)                       | 1393 (9.6%)                          |
| Pulse    | 966 (33.3%)                     | 6372 (44.0%)                         |

### Supplementary material S3. Additional iterations of model with AUC, AIC and BIC.

| Clinical Variable                     | Model 1 | Model 2 | Model 3 | Model 4 | Model 5 | Model 6 | Model 7 | Model 8 |
|---------------------------------------|---------|---------|---------|---------|---------|---------|---------|---------|
| Diagnosis Hypertension                | X       | X       | X       | X       | X       | X       | X       | x       |
| Diagnosis of tachycardia              |         |         | X       | X       | X       | X       |         | x       |
| Beta blocker category                 | X       | X       | X       | X       | X       | X       | X       | x       |
| Diagnosis atrial fibrillation (AF)    | X       | X       | X       | X       | X       | X       | X       | x       |
| Diagnosis palpitations                | X       | X       | X       | X       | X       | X       |         | x       |
| Diagnosis Heart failure               |         |         |         |         | X       |         |         |         |
| Diagnosis peripheral arterial disease |         |         |         |         | X       |         |         |         |
| Diagnosis IHD                         |         |         |         |         | X       |         |         |         |
| Diagnosis Stroke/ TIA                 |         |         |         |         | X       |         |         |         |
| Diagnosis dizziness                   | X       | X       | X       | X       | X       | X       | X       | x       |
| Diagnosis Collapse                    |         | X       | X       | X       | X       | X       | X       | x       |
| Systolic BP (mean)                    | X       | X       | X       | X       | X       | X       | X       | x       |
| Diastolic BP (mean)                   | X       | X       | X       | X       | X       | X       | X       | x       |
| Pulse rate (mean)                     |         |         |         | X       | X       |         |         | x       |
| BMI                                   |         |         |         |         |         |         |         | x       |
| Ethnicity White Non-White             | X       | X       | X       | X       | X       |         | X       |         |
| Log mean pulse ^3,3                   | x       | x       | x       |         | x       | x       | x       | x       |
| <b>AIC</b>                            | 14806   | 14806   | 14804   | 14824   | 14779   | 14991   | 14895   | 14964   |
| <b>BIC</b>                            | 14907   | 14914   | 14920   | 14933   | 14950   | 15100   | 14996   | 15088   |
| <b>AUC</b>                            | 0.669   | 0.669   | 0.67    | 0.668   | 0.673   | 0.6401  | 0.66    | 0.6421  |
